# Supplementary material
Source: Springer Nature journal article supplement (https://www.springermedizin.de/resource/supplementary/12891_2009_917_MOESM1_ESM.pdf/9506700)

Percent with Neck Pain

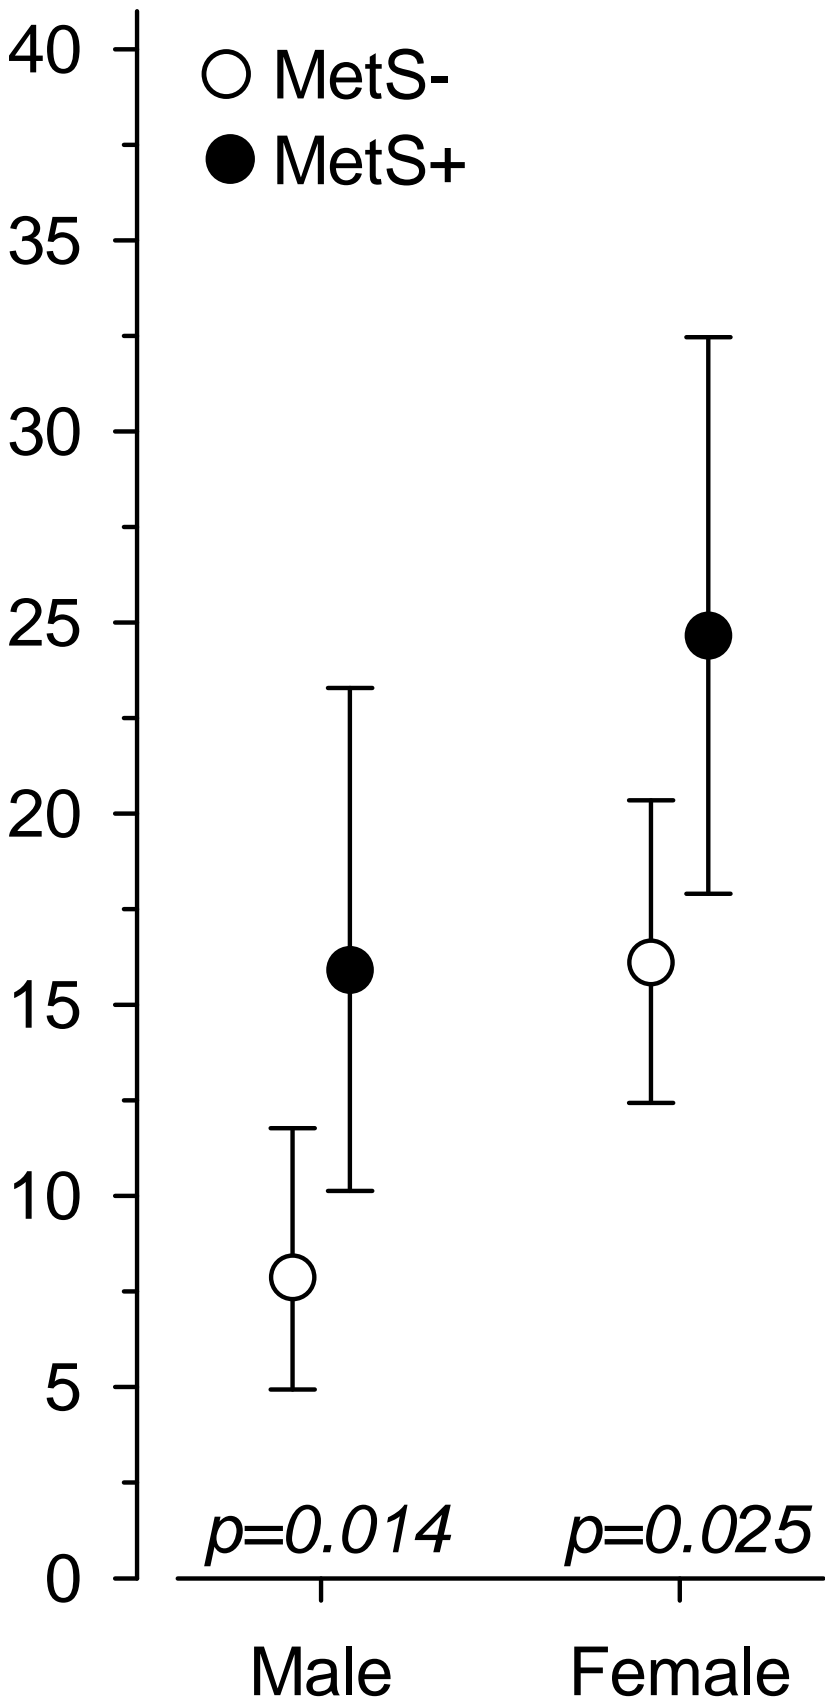

Supplement: MOESM1 [file 9506700]
